# Supplementary material
Source: PubMed Central journal article supplement (PMC3223331)
Supplement: NIHMS319137-supplement-01.pdf [file NIHMS319137-supplement-01.pdf]

## Supplemental Data

### Supplemental Figure 1

Axin2 is preferentially expressed in E7.5-E8.75 endoderm and is expressed at lower levels in anterior endoderm.

Graph displaying the rank invariant-normalized arbitrary unit microarray expression values of Axin2 in definitive endoderm from multiple embryonic stages and from E8.5 anterior definitive endoderm.

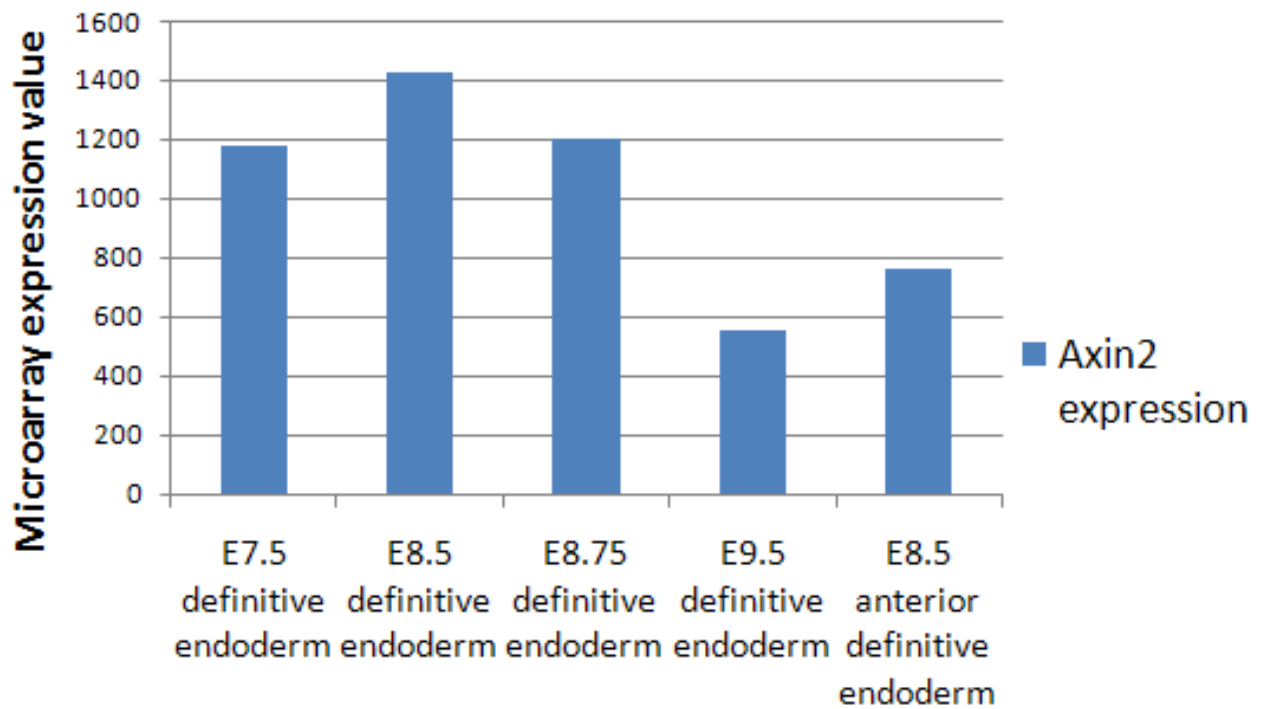

## Supplemental Figure 2

Timecourse and age-dependence of Cdx2 induction by CA  $\beta$ -catenin

(A-C) Wholemout confocal immunofluorescence images of E8.25 foregut and midgut 4 hours (A), 8 hours (B), 12 hours (C), and 72 hours (D) after electroporation with CA  $\beta$ -catenin and placement in whole embryo culture (A-C) or whole embryo culture for 24 hours followed by explants culture for 48 hours (D). Embryos are stained for GFP (green), Cdx2 (red) and Sox2 (blue). (E-G) Wholemout confocal immunofluorescence images of E7.75 anterior endoderm (E) and E9.5 stomach (F-G) electroporated with CA  $\beta$ -catenin and placed in explant culture for 24 hours. Embryos are stained for GFP (green), Cdx2 (red), and Foxa2 (blue). Scale bar equals 200  $\mu$ m in A-D, 50  $\mu$ m in E-G.

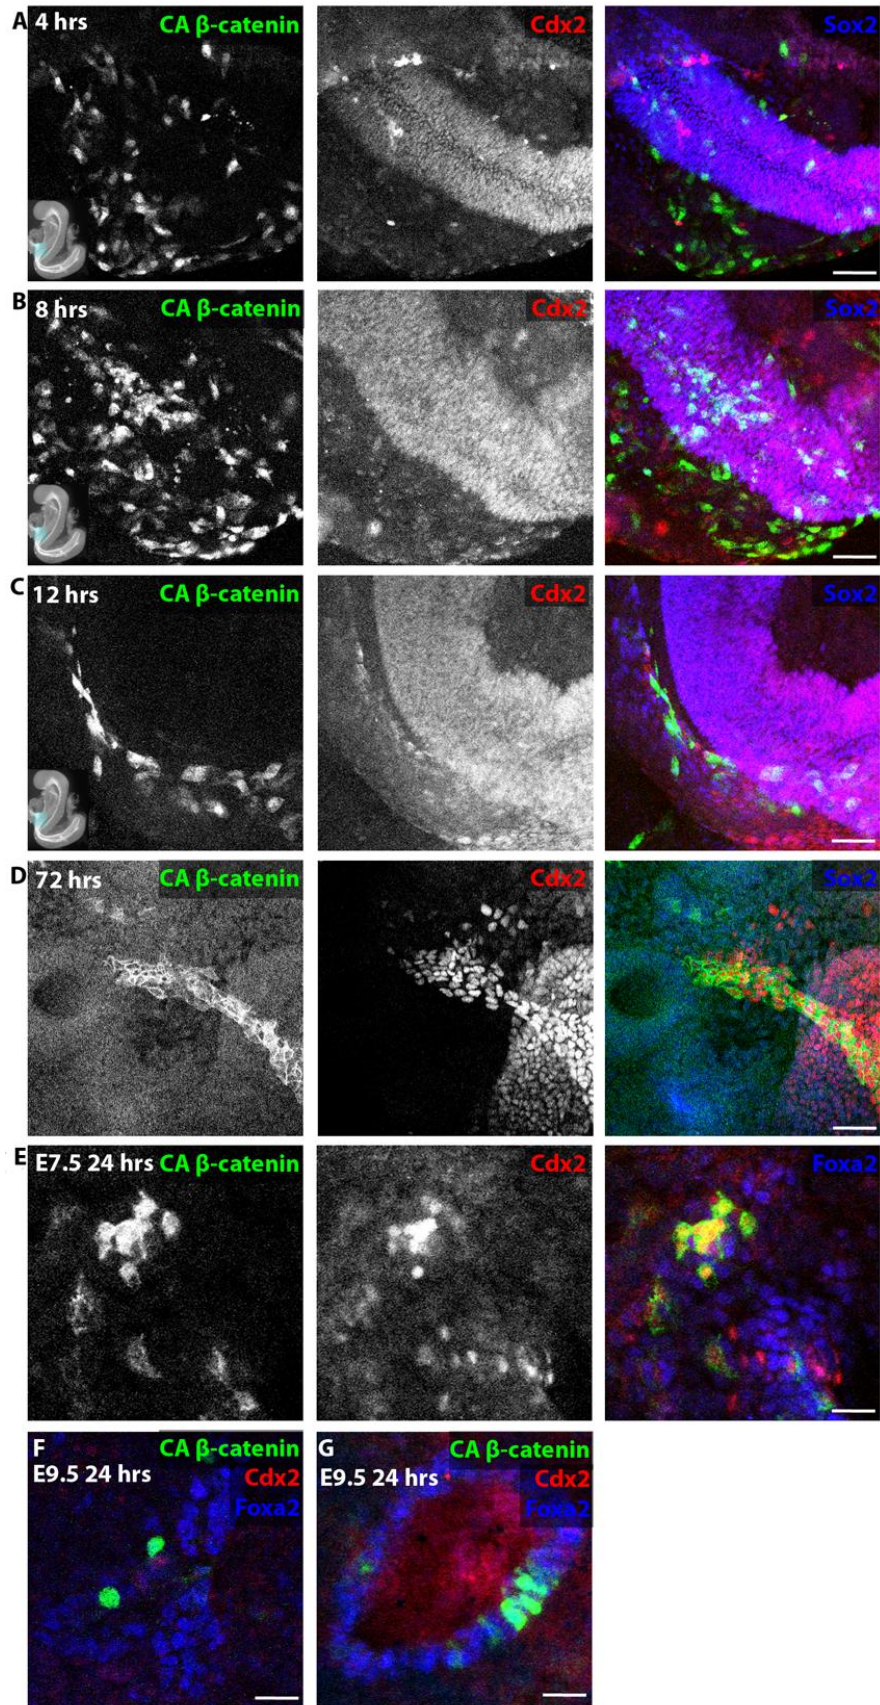

### Supplemental Figure 3

Optimization of ES cell differentiation toward definitive endoderm

(A-J) Immunofluorescence analysis of ES cells treated with Activin A from days 2-5 (A-B), Activin A from days 2-5 and GSK3iXV from day 2-3 (C-D), Activin A from days 2-5 and the Wnt inhibitor PNU74654 from day 2-3 (E-F), Activin A from days 2-5 and the Bmp inhibitor Dorsomorphin from days 3-5 (G-H), or Activin A from days 2-5 and Bmp4 from days 3-5 (I-J) before fixation and stained for Sox17 (green) and Foxa2 (red). Nuclei are stained with Hoechst 33342 (B, D, F, H, J). (K) Graph displaying percentage of Sox17<sup>+</sup>Foxa2<sup>+</sup> endoderm at day 5 following indicated treatment. (L-M) Immunofluorescence analysis of HUES8 human ES cell-derived endoderm stained for Sox17 (green) and Foxa2 (red). Nuclei are stained for Hoechst 33342 (M). (N) Graph displaying percentage of Foxa2<sup>+</sup> endoderm cells that are Cdx2<sup>+</sup> after 24 hours of the indicated treatment. Scale bar equals 50  $\mu$ m in B, D, F, H, J, and M.



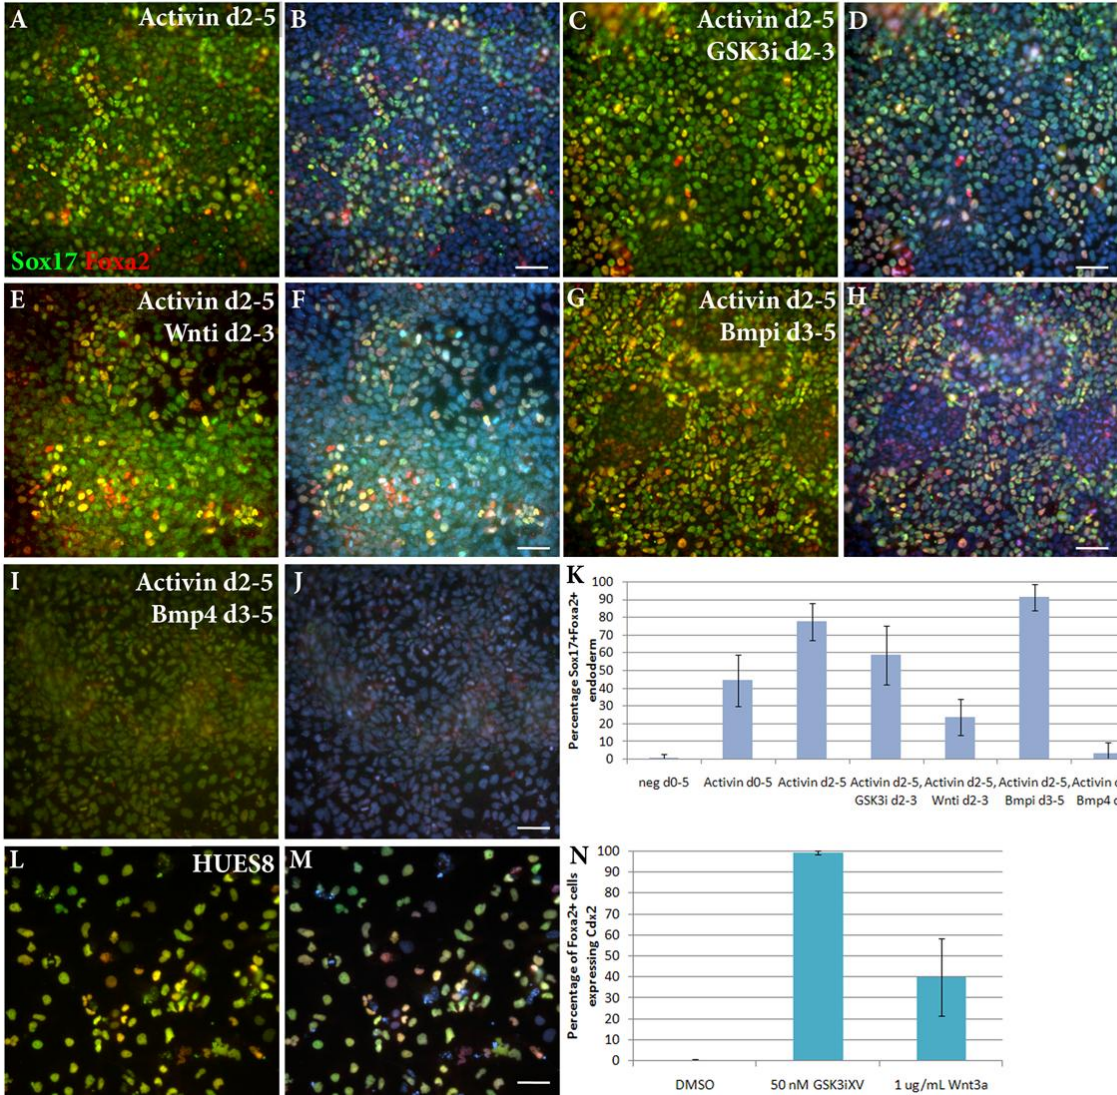

### Supplemental Figure 4

Additional examples of genes expressed in distinct anterior-posterior regions of the intestine.

(A-B, D-F) Wholemout in situ hybridization images of E10.5 embryos (A-B) and E14.5 gut (D-F) showing expression of posterior small intestine-specific *Cib2* (A, D) and *Fzd10* (B, E) and cecum-specific *Hoxd10* (F). (C, G) Wholemout immunofluorescence images of E14.5 gut showing expression of anterior small intestine-specific *Anpep* (C) and large intestine-specific *Xpnpep2* (G). Green arrows refer to the anterior border of the intestinal staining and red arrows refer to the posterior border of the intestinal staining.

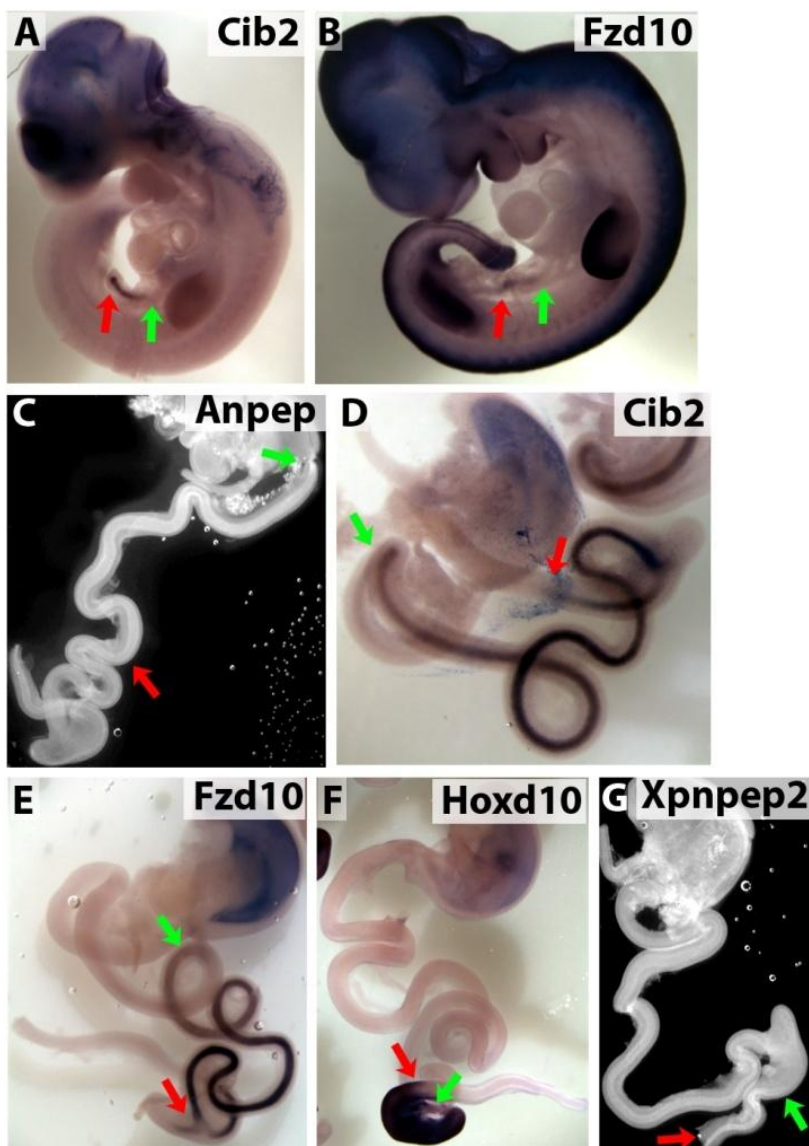

### Supplemental Figure 5

High-levels of Cdx2 upregulate large intestinal genes in ES-derived endoderm.

Graph displaying the normalized microarray expression values of large-intestine specific genes in ES-derived endoderm treated with DMSO (blue), GSK3iXV (red), Doxycycline to induce ectopic Cdx2 (purple) or GSK3iXV and Doxycycline (green).

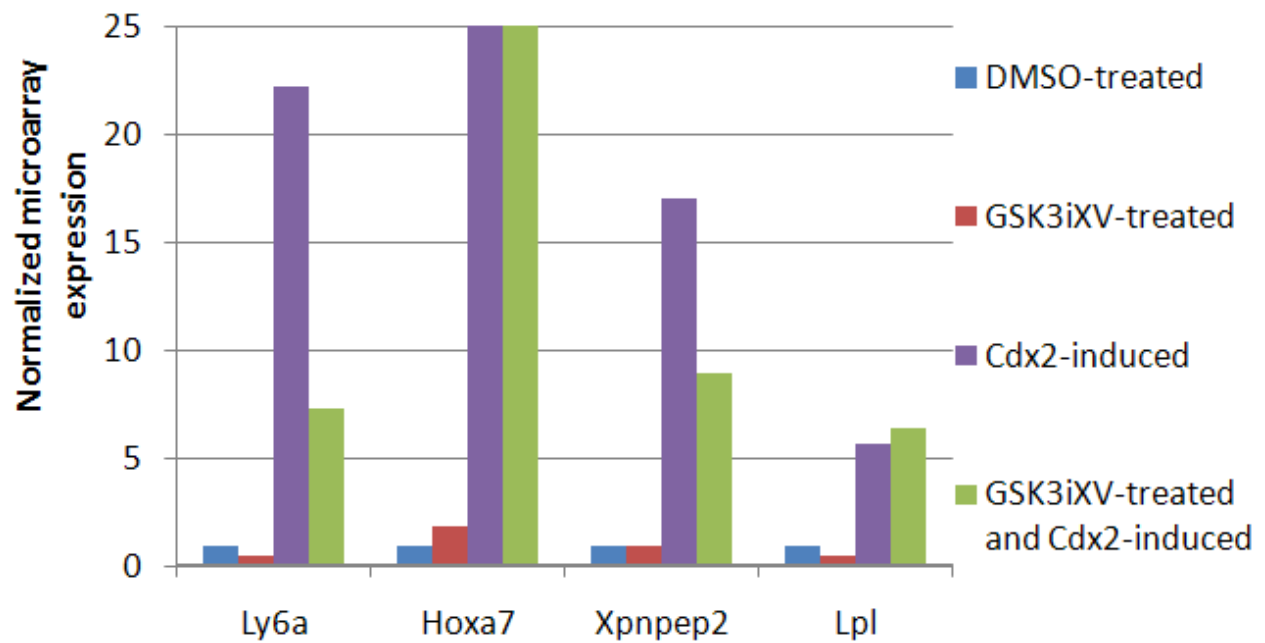

### **Supplemental Table 1**

Complete list of genes significantly affected by GSK3iXV treatment in E8.25 foregut endoderm.

Expression of these genes is changed >3-fold in EpCAM<sup>+</sup> endoderm by 24-hour treatment of E8.25 foregut endoderm with 10 mM GSK3iXV beads.



| Genes upregulated in GSK3iXV-treated E8.25 endoderm |               |           |         |          | Genes downregulated in GSK3iXV-treated E8.25 endoderm |           |
|-----------------------------------------------------|---------------|-----------|---------|----------|-------------------------------------------------------|-----------|
| 0610039N19Rik                                       | AW061290      | Epha3     | Mod1    | S100a3   | Sep5                                                  | Itga11    |
| 0610041B22Rik                                       | AW125753      | Epha7     | Mogat2  | S100a6   | 4930519N16Rik                                         | Itih2     |
| 1110012M11Rik                                       | Axin2         | Evx1      | Mrpl2   | Sca1     | 5330439J01Rik                                         | Ldb2      |
| 1110020C13Rik                                       | AY761185      | Fabp3     | Mst1r   | Scamp2   | Acas2l                                                | Ldoc1     |
| 1110032A13Rik                                       | BC018465      | Fbxo6b    | Msx1    | Scamp5   | Accn1                                                 | Lpl       |
| 1190002C06Rik                                       | BC030476      | Fgf17     | Msx2    | Scap     | Acsm3                                                 | Magee1    |
| 1200009O22Rik                                       | BC049816      | Fgfbp3    | Mt1     | Scnm1    | Adrb2                                                 | Mcm6      |
| 1600002K03Rik                                       | Bdh           | Flt1      | Mt2     | Sct      | Agpt2                                                 | Meox1     |
| 1700011111Rik                                       | Bhmt2         | Foxq1     | Mta3    | Sdcbp2   | Aldh1a3                                               | MGC106740 |
| 1700029G01Rik                                       | Bop1          | Fst       | Myo9b   | Sepp1    | Ambp                                                  | Myl2      |
| 2300002D11Rik                                       | C130034I18Rik | Fut2      | Nbl1    | Shf      | Ankrd1                                                | Myl7      |
| 2300002D11Rik                                       | C2            | Fzd1      | Neu1    | Siglech  | Anxa11                                                | Nkx2-3    |
| 2310042N02Rik                                       | C86987        | Fzd10     | Neur1   | Sirt7    | Apoa2                                                 | Nkx2-5    |
| 2310046K01Rik                                       | Car11         | Gababrbp  | Nfe2l3  | Slc27a3  | Arg1                                                  | Nkx2-6    |
| 2400003C14Rik                                       | Car13         | Gad1      | Ngfr    | Slc29a1  | B3galnt1                                              | Nkx3-1    |
| 2410001C21Rik                                       | Cbln1         | Gadd45g   | Nin     | Slc3a2   | Bmper                                                 | Nnat      |
| 2410080H04Rik                                       | Ccdc3         | Gba       | Nkd1    | Slc7a3   | C630028C02Rik                                         | Npr3      |
| 2510009E07Rik                                       | Cd27          | Gbx2      | Nme5    | Smpd3    | Cldn11                                                | Nptx2     |
| 2610027C15Rik                                       | Cdkn1a        | Gch1      | Nos3as  | Snca     | Col2a1                                                | Nrn1      |
| 2610033H07Rik                                       | Cdx1          | Gjb2      | Notch1  | Snx17    | Corin                                                 | Nsbp1     |
| 2700017M01Rik                                       | Cdx2          | Gjb6      | Nspc1   | Soat1    | Crabp2                                                | Nsg2      |
| 2700050C12Rik                                       | Cerk          | Gna14     | Nt5c    | Sox17    | Cxcl12                                                | Olfm1     |
| 2810417J12Rik                                       | Ch25h         | Gnefr     | Nt5e    | Sp5      | Cyp24a1                                               | Onecut2   |
| 2900024C23Rik                                       | Chrd          | Gng2      | Odz4    | Sp6      | Dab1                                                  | Paqr9     |
| 2900046G09Rik                                       | Cited1        | Golga2    | Optn    | Sp7      | Dab2                                                  | Pax9      |
| 2900093B09Rik                                       | Cklfsf4       | Gorasp2   | Ovol1   | Sp8      | Dcn                                                   | Pdcd4     |
| 3010003L21Rik                                       | Clic6         | Gpc2      | Pde10a  | Spo11    | Dmrt3                                                 | Pitx2     |
| 4732456N10Rik                                       | Cog8          | Gpnmb     | Pdgfc   | Stat3    | Edn1                                                  | Pknx2     |
| 4732481H14Rik                                       | Crabp1        | Gpr156    | Pdlim4  | Stat5a   | Efcab1                                                | Pmp22     |
| 4930511J11Rik                                       | Crym          | Gpr49     | Pet112l | Surf4    | Ets1                                                  | Prkwnk1   |
| 5031410I06Rik                                       | Cyfp2         | Gpr83     | Pex2    | Svopl    | Fgf10                                                 | Ptpre     |
| 5730593N15Rik                                       | D11Moh35      | Gpx2      | Pgls    | T        | Fgf13                                                 | Pyy       |
| 8430438D04Rik                                       | D15Ert682e    | Gulo      | Phlda2  | Tacstd2  | Fgf15                                                 | Raet1b    |
| 9330161F08Rik                                       | D15Mgi27      | Hdac6     | Plk3    | Tbrg1    | Fgf16                                                 | Rarb      |
| 9630019K15Rik                                       | Decr1         | Hoxa7     | Polr3b  | Tbx3     | Fhl2                                                  | Reln      |
| 9930017A07Rik                                       | Defcr         | Hoxc9     | Pon2    | Tcf7     | Foxa1                                                 | Ret       |
| A630042L21Rik                                       | Defcr26       | Hoxd8     | Por     | Tcfap2c  | Foxc1                                                 | Rgs5      |
| A730017C20Rik                                       | Defcr-rs10    | Hoxd9     | Pou4f1  | Tex264   | Foxc2                                                 | Rsn       |
| Abcg5                                               | Defcr-rs2     | Hspb1     | Ppap2b  | Tiam1    | Foxd4                                                 | Serpina1b |
| Abhd2                                               | Defcr-rs7     | Ifitm1    | Ppp1r1c | Tiam2    | Foxe1                                                 | Serpinf2  |
| Abhd2                                               | Dkk1          | Ifngr2    | Pqlc2   | Timm50   | Foxg1                                                 | Sertad4   |
| Acta1                                               | Dkk3          | Ilvbl     | Prf1    | Tirap    | Foxi2                                                 | Sfrp1     |
| Actb                                                | Dkk4          | Itm2b     | Prkcabp | Tlx2     | Frat2                                                 | Six1      |
| Ada                                                 | Dlx2          | Jmjd3     | Psd2    | Tnfrsf19 | Fzd4                                                  | Slc35f3   |
| Adssl1                                              | Dnajc6        | Klf5      | Psmf1   | Tnrc11   | Glrx                                                  | Sox2      |
| Agpat3                                              | Dncic1        | Klh8      | Ptn     | Trib3    | Gpx3                                                  | Ssbp2     |
| AI481500                                            | Dok4          | Kremen2   | Ptpla   | Trim29   | Hifx                                                  | Tbx1      |
| Anxa2                                               | Dpp6          | Lgals3    | Ptpn1   | Trp63    | Hey1                                                  | Tgm2      |
| Apcdd1                                              | Dpp7          | Lmo2      | Pygl    | Twist2   | Hhex                                                  | Thbd      |
| Apfp2                                               | Dpp8          | LOC622404 | Rabggta | Uap1l1   | Hoxb1                                                 | Titf1     |
| Aqp1                                                | Dtx2          | Lrp4      | Rbpjl   | Uck1     | Hs3st6                                                | Tmem46    |
| Aqp11                                               | E430025E21Rik | Lrrc15    | Rec8L1  | Wbscr16  | Hsd11b2                                               | Vgll2     |
| Arfp2                                               | Edar          | Lrrn1     | Renbp   | Wif1     | Igfbp3                                                | Vtn       |
| Aspscr1                                             | Efnb1         | Lrrn3     | Rhbdl2  | Wnt10a   | Igfbp5                                                |           |
| Atf5                                                | EG665378      | Mal       | Rims3   | Wnt3a    |                                                       |           |
| Atox1                                               | Egfr          | Mapkbp1   | Rin2    | Wnt6     |                                                       |           |
| Atp10a                                              | Elovl1        | Matn4     | Rod1    | Zdhhc4   |                                                       |           |
| Atp13a1                                             | Emid2         | Mccc1     | Rpl14   | Zfp259   |                                                       |           |
| Atp6v0b                                             | En2           | MGC99845  | Rps6k11 | Zic1     |                                                       |           |
| Atp6v1f                                             | Epb4.9        | Mglap     | Runx1   | Zxda     |                                                       |           |

## **Supplemental Table 2**

Complete list of genes significantly affected by GSK3iXV treatment in ES cell-derived endoderm.

Expression of these genes is changed >3-fold by treatment of ES cell-derived endoderm with 50 nM GSK3iXV.

| Genes upregulated in GSK3iXV-treated ES-derived endoderm |           | Genes downregulated in GSK3iXV-treated ES-derived endoderm |           |         |
|----------------------------------------------------------|-----------|------------------------------------------------------------|-----------|---------|
| 1200015N20Rik                                            | Fst       | 0610041G09Rik                                              | Gata3     | Peg3    |
| 1700011H14Rik                                            | Fzd10     | 1190007F08Rik                                              | Gckr      | Pem     |
| 2010016F14Rik                                            | Gad1      | 1200009O22Rik                                              | Gfod1     | Pga5    |
| 2510009E07Rik                                            | Gas6      | 1200013B22Rik                                              | Ghrl      | Pgam2   |
| 2610001E17Rik                                            | Gbx2      | 1700007G11Rik                                              | Gkn1      | Pik3r3  |
| 2610019F03Rik                                            | Gjb2      | 1700027A23Rik                                              | Glrx      | Plxna2  |
| 2610318G18Rik                                            | Gpr114    | 1810036H07Rik                                              | Gpc4      | Ppnr    |
| 2810003C17Rik                                            | Gpr49     | 2810417M05Rik                                              | Gpr120    | Ppp1r1a |
| 4930517K23Rik                                            | Gpx2      | 4631426J05Rik                                              | Gpr23     | Prg     |
| 5730593N15Rik                                            | Hoxa1     | 6330403K07Rik                                              | Gsc       | Pyy     |
| 9930023K05Rik                                            | Irb4      | 6530413N01Rik                                              | H19       | Rab27a  |
| AA175286                                                 | Ifitm1    | 9130213B05Rik                                              | Hesx1     | Rfxdc1  |
| Acot1                                                    | Igfbp4    | Acta2                                                      | Hhex      | Rin3    |
| Actb                                                     | Kel       | Aff1                                                       | Hs3st1    | Robo1   |
| Ada                                                      | Lmo2      | Agpt2                                                      | Id2       | Sbk     |
| Adcy8                                                    | LOC212390 | AI427138                                                   | Igf2      | Sec14l2 |
| Add3                                                     | Mal       | Apoa1                                                      | Igfbp5    | Sema3f  |
| Ahsg                                                     | Matn4     | Atp10d                                                     | Irx5      | Sema6d  |
| Alox12e                                                  | Mcc       | AW548124                                                   | Isl1      | Sfrp1   |
| Alox15                                                   | Mixl1     | B230104P22Rik                                              | Kcnc4     | Sh3tc1  |
| Ambp                                                     | Mllt3     | BC019731                                                   | Kirrel3   | Shroom3 |
| Apcdd1                                                   | Mogat2    | Bcl2l11                                                    | Lama1     | Slc12a2 |
| Aqp11                                                    | Msx1      | Bmper                                                      | Lamc1     | Slc7a8  |
| Ass1                                                     | Nefm      | Cadps2                                                     | Leftb     | Slco2a1 |
| Atoh8                                                    | Ngfr      | Cbln1                                                      | Lhfp      | Sparc   |
| Atp1a2                                                   | Pcsk9     | Cd59a                                                      | Lhx1      | Spin2   |
| Axin2                                                    | Pdk1      | Cdkn2b                                                     | Lmyc1     | Srd5a2  |
| AY761185                                                 | Pglyrp1   | Cer1                                                       | LOC434197 | Tal2    |
| B830021E24Rik                                            | Phlda1    | Cfc1                                                       | Lrp12     | Tbx1    |
| BC018465                                                 | Phlda2    | Chga                                                       | Lrpap1    | Tcf7l2  |
| BC040774                                                 | Ppl       | Chi3l1                                                     | Ltbp1     | Tgfb2   |
| Bhlhb2                                                   | Psd2      | Chst1                                                      | Matn1     | Tgfb2   |
| Card10                                                   | Ptk7      | Cish                                                       | Mbp       | Tgfb3   |
| Ccnd1                                                    | Punc      | Cldn3                                                      | Mertk     | Thbd    |
| Cdx1                                                     | Rec8L1    | Cntnap2                                                    | Mest      | Tm6sf1  |
| Cdx2                                                     | Rfx4      | Cxnc4                                                      | MGC106740 | Tmem46  |
| Cpn1                                                     | Rps6kl1   | Cyp26a1                                                    | Mt2       | Tmem63a |
| Cpz                                                      | Scara5    | Cyp2j9                                                     | Mxi1      | Tnnc1   |
| Csn3                                                     | Sepp1     | Cyr61                                                      | Myl7      | Tnnt1   |
| Cyp1b1                                                   | Serpina5  | D030013I16Rik                                              | Myocd     | Tph1    |
| Defcr                                                    | Slc16a10  | Dgkk                                                       | Nkx2-3    | Tpm1    |
| Defcr26                                                  | Slc1a4    | Dmbx1                                                      | Nptx2     | Tspan7  |
| Defcr4                                                   | Smox      | Dpysl3                                                     | Otx2      | Ttr     |
| Defcr6                                                   | Sp5       | Ephb1                                                      | Pard6g    | Tuba8   |
| Defcr-rs1                                                | Sp8       | Fgf5                                                       | Pcdh21    | Tulp1   |
| Defcr-rs10                                               | Spo11     | Fgfbp1                                                     | Pcdh7     | Vav3    |
| Defcr-rs12                                               | Spon1     | Foxd4                                                      | Pde1b     | Zfpm1   |
| Defcr-rs2                                                | Tcf2      | Fzd7                                                       |           |         |
| Defcr-rs7                                                | Tcf7      |                                                            |           |         |
| Dkk3                                                     | Tm4sf12   |                                                            |           |         |
| Dkk4                                                     | Tmem77    |                                                            |           |         |
| Dpp4                                                     | Tmprss2   |                                                            |           |         |
| EG545370                                                 | Tnfrsf19  |                                                            |           |         |
| Emid1                                                    | Unc5c     |                                                            |           |         |
| Emid2                                                    | Wnt5b     |                                                            |           |         |
| Evx1                                                     | Wnt6      |                                                            |           |         |
| Fgfbp3                                                   | Wnt7a     |                                                            |           |         |

### Supplemental Table 3

Complete list of genes preferentially expressed in specific E14.5 gut segments.

These genes have expression >3-fold higher in one E14.5 gut segment as compared to all other segments.

| Stomach       | Anterior small intestine | Posterior small intestine | Large intestine |
|---------------|--------------------------|---------------------------|-----------------|
| 2210413P10Rik | Amica1                   | Cdo1                      | 1700011H14Rik   |
| Bace2         | Anpep                    | Cib2                      | 4732472I07Rik   |
| Corin         | Areg                     | Fzd10                     | Abi3            |
| Creb3l4       | Btc                      | Gpr49                     | Abp1            |
| D930038M13Rik | Crp                      | Guca2a                    | Adh1            |
| Dmn           | Dlk1                     | Ly64                      | Afp             |
| Ern2          | Dmbt1                    | Mamdc4                    | Aim2            |
| Evi1          | Dusp4                    | Olfml1                    | Anxa3           |
| Gsta4         | Egln3                    | Osr2                      | Atp12a          |
| Idb4          | Enpp1                    | Prodh2                    | Atp2a3          |
| Ly6h          | Eps8l3                   | Sct                       | BC025446        |
| Mds1          | Gpr128                   | Sdh1                      | Bcas1           |
| Rasgrp3       | Gpx3                     | Snca                      | Crim2           |
| Sox21         | Igsf1                    | Vim                       | D030013I16Rik   |
|               | Lgals3bp                 |                           | Emp2            |
|               | Onecut2                  |                           | Evx1            |
|               | Ppargc1b                 |                           | Fabp3           |
|               | Prap1                    |                           | Fxyd4           |
|               | Siat8c                   |                           | Gcnt1           |
|               | Smoc1                    |                           | Gdnf            |
|               | Spp1                     |                           | Gna14           |
|               | Tm4sf4                   |                           | Gne             |
|               | Tulp2                    |                           | Hoxa7           |
|               | Upk3b                    |                           | Hoxb7           |
|               |                          |                           | Liph            |
|               |                          |                           | LOC233038       |
|               |                          |                           | Lor             |
|               |                          |                           | Lpl             |
|               |                          |                           | Ly6a            |
|               |                          |                           | Nrn1            |
|               |                          |                           | Pdzk1           |
|               |                          |                           | Ppp1r1b         |
|               |                          |                           | Prkcdbp         |
|               |                          |                           | Schip1          |
|               |                          |                           | Serpib1a        |
|               |                          |                           | Slc5a8          |
|               |                          |                           | Sri             |
|               |                          |                           | Stxbp1          |
|               |                          |                           | Upk1a           |
|               |                          |                           | Xpnpep2         |

#### **Supplemental Table 4**

Complete list of genes significantly affected by GSK3iXV treatment in ES cell-derived endoderm, grouped based on whether or not they are coordinately changed by Cdx2 induction.

Expression of these genes is changed >2.5-fold by treatment of ES cell-derived endoderm with 50 nM GSK3iXV.



| Genes upregulated in GSK3iXV-treated ES-derived endoderm |                             |           | Genes downregulated in GSK3iXV-treated ES-derived endoderm |           |                                   |           |
|----------------------------------------------------------|-----------------------------|-----------|------------------------------------------------------------|-----------|-----------------------------------|-----------|
| Induced by Ectopic Cdx2                                  | Not Induced by Ectopic Cdx2 |           | Downregulated by Ectopic Cdx2                              |           | Not Downregulated by Ectopic Cdx2 |           |
| 2510009E07Rik                                            | 1200015N20Rik               | Hebp1     | 1190002A17Rik                                              | Lhx1      | 1110003E01Rik                     | Irx5      |
| 2610318G18Rik                                            | 1700019D03Rik               | Hoxa1     | 1700027A23Rik                                              | LOC620807 | 1110035L05Rik                     | Itpr3     |
| 4930511J11Rik                                            | 2610019F03Rik               | Hoxb1     | 2310045A20Rik                                              | Loxl1     | 1190007F08Rik                     | Krt1-18   |
| Adcy8                                                    | 2900093B09Rik               | Hoxb2     | 2410012C07Rik                                              | Ly6h      | 1200009O22Rik                     | Lasp1     |
| Aldh4a1                                                  | 3632451O06Rik               | Hoxb4     | 3110001A13Rik                                              | Matn1     | 1200013B22Rik                     | Leftb     |
| Ambp                                                     | 4632425D07Rik               | Hoxb5     | 9130213B05Rik                                              | Mertk     | 1600023A02Rik                     | Lgals3bp  |
| Arid5b                                                   | 5730593N15Rik               | Ifi30     | Adams4                                                     | Mfap4     | 1700007G11Rik                     | Lhfp      |
| Atp1b1                                                   | 6330505N24Rik               | Ifitm1    | AI427138                                                   | Nkx2-3    | 2310010M24Rik                     | Lmyc1     |
| B430218L07Rik                                            | A730017C20Rik               | Ihh       | Alcam                                                      | Nkx2-5    | 2810046M22Rik                     | LOC434197 |
| B4galnt2                                                 | A930010I20Rik               | Kcnj4     | Amn                                                        | Nkx3-1    | 4631426J05Rik                     | Mbp       |
| B830021E24Rik                                            | Abhd2                       | Kdelr3    | Apoa1                                                      | Nptx2     | 6330403K07Rik                     | Mest      |
| Chst7                                                    | Acot1                       | LOC212390 | BC011468                                                   | Nsg2      | 8430427H17Rik                     | Mfap2     |
| Cyp1b1                                                   | Adcy2                       | Lrig1     | BC037527                                                   | Nxf7      | Acaa2                             | Mical1    |
| Evx1                                                     | AI413582                    | Matn4     | BC055811                                                   | Otx2      | Acad10                            | Mmp17     |
| Gprc5a                                                   | Aldh1a2                     | Mcc       | Bmper                                                      | Pacsin1   | Acta2                             | Mreg      |
| Hoxa5                                                    | Aldh5a1                     | Mixl1     | Car14                                                      | Pde1b     | Actc1                             | Mtap1b    |
| Lmo2                                                     | Aldoc                       | Mllt3     | Car2                                                       | Pdyn      | Aff1                              | Mxi1      |
| Msx1                                                     | Apccd1                      | Nkd1      | Cer1                                                       | Peg3      | Agot2                             | Myl4      |
| Msx2                                                     | Aqp11                       | Nkd2      | Chi3l1                                                     | Pou3f1    | Akr1c19                           | Myl7      |
| Ngfr                                                     | Ass1                        | Nkx1-2    | Chst1                                                      | Prkch     | Ankrd1                            | Nuak1     |
| Ptk7                                                     | Atp1a2                      | Nme5      | Clip1                                                      | Pyy       | Anxa6                             | Pcdh7     |
| Punc                                                     | Axin2                       | Nos3as    | Coch                                                       | Rab27a    | Art5                              | Pcsk1n    |
| Sh3gl2                                                   | AY761185                    | Nrarp     | Col2a1                                                     | Rarb      | Atp10d                            | Pdlim3    |
| Smarca2                                                  | B3gnt7                      | Nup210    | Cplx2                                                      | Rasgrp3   | AW548124                          | Pga5      |
| Tcf2                                                     | BC018465                    | Pcsk9     | Crx                                                        | Rax       | Axud1                             | Pgam2     |
| Tmem77                                                   | BC040774                    | Pdgfra    | Cyp26a1                                                    | Rfx2      | B230104P22Rik                     | Pik3r3    |
| Tmprss2                                                  | Bhlhb2                      | Pglyrp1   | Dnmt3b                                                     | Rfxdc1    | BC019731                          | Plac1     |
|                                                          | Cdx1                        | Phlda2    | Efcfb2                                                     | Rsn       | Bok                               | Plekha6   |
|                                                          | Cdx2                        | Plcg2     | Eomes                                                      | Sfrp1     | C630028C02Rik                     | Pls3      |
|                                                          | Chst2                       | Ppp1r3c   | Fgf5                                                       | Sgk       | Cacna2d3                          | Ppnr      |
|                                                          | Cited1                      | Ptplb     | Foxd4                                                      | Shh       | Cadps2                            | Ppp1r1a   |
|                                                          | Cpn1                        | Rab11fip5 | Foxh1                                                      | Six1      | Capn6                             | Prnd      |
|                                                          | Cpz                         | Rec8L1    | Fzd2                                                       | Slc12a2   | Cbln1                             | Prss19    |
|                                                          | Crtac1                      | Sepp1     | Ghrl                                                       | Slc1a3    | Ccdc68                            | Qprt      |
|                                                          | Cxx1a                       | Serpina5  | Gjb3                                                       | Slc7a8    | Cd24a                             | Rasl11a   |
|                                                          | Cxx1c                       | Serpina6  | Gpr23                                                      | Soat2     | Cd59a                             | Rbp4      |
|                                                          | Cyp27a1                     | Sesn3     | Gsc                                                        | Sox9      | Chga                              | Rem2      |
|                                                          | Defcr                       | Slc16a10  | H19                                                        | Sst       | Cish                              | Rgs5      |
|                                                          | Defcr26                     | Slc1a4    | Has2                                                       | Tal2      | Ckb                               | Rin3      |
|                                                          | Defcr-rs1                   | Slc24a3   | Hesx1                                                      | Tbx1      | Cldn3                             | Robo1     |
|                                                          | Defcr-rs10                  | Slc38a4   | Hhex                                                       | Tmem46    | Clu                               | Rtn2      |
|                                                          | Defcr-rs2                   | Smox      | Hsd11b2                                                    | Tnrc9     | Cntnap2                           | Sall1     |
|                                                          | Defcr-rs7                   | Sostdc1   | Igf2                                                       | Tph1      | Ctgf                              | Satb1     |
|                                                          | Dll1                        | Sp5       | Isl1                                                       | Ttr       | Ctsc                              | Sbk       |
|                                                          | Dpp4                        | Sp8       | Kctd12b                                                    | Utf1      | Cxxc4                             | Sec14l2   |
|                                                          | Dpysl4                      | Spo11     | Laptm5                                                     | Wispl     | D030013116Rik                     | Sema3f    |
|                                                          | Efhd1                       | Srrp      |                                                            | Zfpn1     | Dab1                              | Sertad4   |
|                                                          | Emid1                       | Stard8    |                                                            |           | Ddah1                             | Sh3tc1    |
|                                                          | Epha1                       | Stmn4     |                                                            |           | Ddc                               | Shrm      |
|                                                          | Etv4                        | Stra6     |                                                            |           | Dgkk                              | Shroom3   |
|                                                          | Fgf17                       | Syng2     |                                                            |           | Dpysl3                            | Slc38a5   |
|                                                          | Fgfbb3                      | Sytl1     |                                                            |           | Ebaf                              | Slit2     |
|                                                          | Foxb1                       | Tbx6      |                                                            |           | Efna5                             | Spdef     |
|                                                          | Fst                         | Tcf7      |                                                            |           | Eppk1                             | Spin2     |
|                                                          | Fzd10                       | Tm4sf12   |                                                            |           | Eras                              | Spon2     |
|                                                          | Gad1                        | Tnfrsf19  |                                                            |           | F2r                               | Syt11     |
|                                                          | Gas6                        | Unc5c     |                                                            |           | Fgd2                              | Syt5      |
|                                                          | Gbx2                        | Wnt10a    |                                                            |           | Fgfbp1                            | Tcf21     |
|                                                          | Gjb2                        | Wnt3a     |                                                            |           | Flrt2                             | Tcf3      |
|                                                          | Gna14                       | Wnt5b     |                                                            |           | Fos                               | Tcf7l2    |
|                                                          | Gpc6                        | Wnt6      |                                                            |           | Frat2                             | Tdrd7     |
|                                                          | Gpr49                       | Wnt7a     |                                                            |           | Fzd7                              | Tgfb2     |
|                                                          | Gpx2                        | Wnt8a     |                                                            |           | Galnt10                           | Tgfb2     |
|                                                          |                             | Zic1      |                                                            |           | Garnl4                            | Tgfb3     |
|                                                          |                             |           |                                                            |           | Gata3                             | Tle4      |
|                                                          |                             |           |                                                            |           | Gckr                              | Tmem108   |
|                                                          |                             |           |                                                            |           | Glrx                              | Tmem2     |
|                                                          |                             |           |                                                            |           | Gng8                              | Tnnc1     |
|                                                          |                             |           |                                                            |           | Gpc4                              | Tnnt1     |
|                                                          |                             |           |                                                            |           | Gpr120                            | Tspan7    |
|                                                          |                             |           |                                                            |           | Gulp1                             | Unc5b     |
|                                                          |                             |           |                                                            |           | Hemp1                             | Vav3      |
|                                                          |                             |           |                                                            |           | Idb1                              | Vwf       |
|                                                          |                             |           |                                                            |           | Igfbp5                            | Ypel1     |
